# Supplementary material
Source: Springer Nature journal article supplement (https://www.springermedizin.de/resource/supplementary/13012_2013_694_MOESM1_ESM.pdf/9630260)
Supplement: MOESM1 [file 9630260]

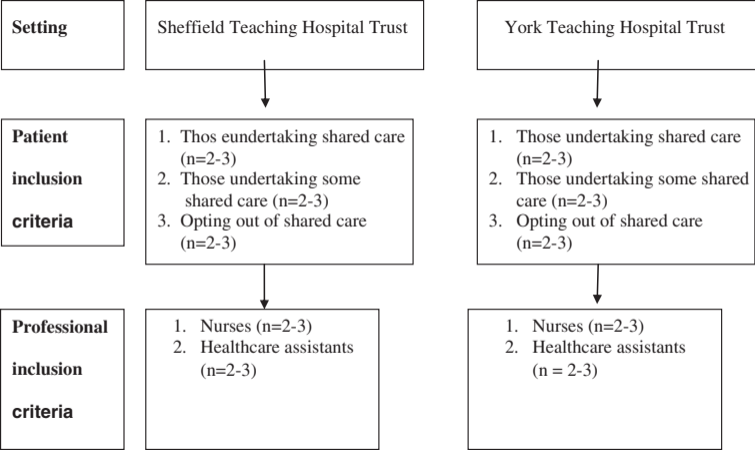**Setting**

Sheffield Teaching Hospital Trust

York Teaching Hospital Trust

**Patient  
inclusion  
criteria**

1. Those undertaking shared care (n=2-3)
2. Those undertaking some shared care (n=2-3)
3. Opting out of shared care (n=2-3)

1. Those undertaking shared care (n=2-3)
2. Those undertaking some shared care (n=2-3)
3. Opting out of shared care (n=2-3)

**Professional  
inclusion  
criteria**

1. Nurses (n=2-3)
2. Healthcare assistants (n=2-3)

1. Nurses (n=2-3)
2. Healthcare assistants (n = 2-3)
